# Supplementary material for: The aryl hydrocarbon receptor and interferon gamma generate antiviral states via transcriptional repression
Source: eLife. 2018 Aug 22;7:e38867. doi: 10.7554/eLife.38867 (PMC6120754; doi:10.7554/eLife.38867)
Supplement: Supplementary file 1. — The fold change in mRNA levels, relative to carrier treated cells, for the top 100 AhR-activation-induced genes is given. [file elife-38867-supp1.xlsx]

## Sheet: Supplementary File 1
	Donor 1		Donor 2		Donor 3
	Gene:	Fold change	Gene:	Fold change	Gene:	Fold change
	SEMA6B	5.85308	THBS1	4.67647	SEMA6B	4.4277
	RASAL1	5.74388	GPR68	3.95812	CYGB	4.41427
	GPR68	4.83996	RASAL1	3.93137	TNFAIP8L3	4.38386
	IL1B	4.14673	SEMA6B	3.86068	GPR68	4.29234
	XYLT1	4.05931	SRPX	3.84345	RASAL1	4.1465
	FUCA1	4.0201	EBI2	3.45896	IL1B	3.80164
	NCF1	3.92559	CYP1B1	3.26369	CXCR5	3.49343
	TMEM119	3.87735	TMEM119	3.24909	EBI2	3.27016
	THBS1	3.8708	TIPARP	3.18753	ITGB7	3.04639
	TIPARP	3.65501	XYLT1	3.13372	COL23A1	2.96013
	EBI2	3.58299	LRP5	3.00683	FUCA1	2.94171
	TNFAIP8L3	3.44124	CYGB	2.77206	TIPARP	2.90546
	NCF1C	3.33012	HS.434957	2.55435	IL8	2.70796
	LOC645638	3.24319	ABCC4	2.49177	NCF1C	2.64923
	THBD	3.15988	TNFAIP8L3	2.42472	CYP1B1	2.54418
	CYGB	3.02703	INSIG1	2.36917	F13A1	2.47961
	ADORA3	2.92159	FUCA1	2.36138	GREM1	2.41176
	COL23A1	2.88072	PRDM8	2.33503	SLC16A6	2.40971
	QPRT	2.76325	ADK	2.32845	THBD	2.40079
	LOC652616	2.75855	GFRA2	2.31269	PHLDA1	2.38701
	PHLDA1	2.73928	PHLDA1	2.28609	NCF1	2.33972
	CXCR5	2.66735	PTGFRN	2.27035	COLEC12	2.33369
	CYP1B1	2.54055	COL23A1	2.26634	KCNF1	2.31538
	GREM1	2.51437	GPR183	2.25224	TMEM119	2.26638
	SLC16A6	2.4314	F13A1	2.23137	STAB1	2.26127
	ITGB7	2.41379	QPRT	2.19233	RAP1GAP	2.25035
	GPR183	2.33739	GAPT	2.18828	M160	2.22907
	RAP1GAP	2.30021	ADORA3	2.18096	HSPE1	2.21127
	INSIG1	2.28491	ITGB7	2.12799	RNASE1	2.19805
	GCNT1	2.2378	COBLL1	2.12696	ADK	2.19761
	ABHD12	2.22046	NCF4	2.09841	TCTEX1D1	2.14024
	ADK	2.21522	SLC16A6	2.09534	CAMK2B	2.12727
	M160	2.2095	NT5DC2	2.0837	GPR183	2.11667
	LPAR2	2.19865	ABI3	2.03808	ABHD12	2.05795
	RUNX3	2.17587	EPB41L3	2.03095	COLQ	2.05692
	MEF2A	2.15143	ABCB4	1.96892	PTPN6	2.03453
	C13ORF31	2.14351	M160	1.95295	ABCB4	2.01037
	CD163L1	2.10949	LOC731658	1.95203	SLC26A11	1.99798
	ABI3	2.1065	RAP1GAP	1.94374	CCL1	1.99255
	PTPN6	2.10318	CD163L1	1.90861	LOC728755	1.98273
	CADM1	2.10138	CHN2	1.89884	LOC645638	1.97804
	TNFSF14	2.07869	SLC1A5	1.89642	ADORA3	1.97215
	NOTCH1	2.04788	ADORA2B	1.88211	NT5DC2	1.96204
	CD226	2.02796	GCNT1	1.88103	CD226	1.93187
	IL8	2.00492	PMP22	1.87981	CADM1	1.9248
	MAOA	1.99633	RASSF2	1.87212	ATP8B4	1.91231
	CAMK2B	1.98907	PTPN6	1.86826	HS.197143	1.90598
	PSTPIP2	1.98546	NBL1	1.85976	LOC100128274	1.90543
	PDPN	1.98505	HBEGF	1.85956	ISYNA1	1.90092
	ISYNA1	1.98206	CCM2	1.8532	CD163L1	1.89464
	HK2	1.97812	IL1B	1.84816	NISCH	1.89027
	GPR162	1.97401	TFAP2C	1.84221	PTGFRN	1.87922
	MAFF	1.96669	IL18BP	1.83077	SAMSN1	1.86943
	C3ORF59	1.96381	RUNX3	1.82886	TEX12	1.86581
	C14ORF43	1.9546	NISCH	1.81849	CDKN1A	1.86277
	NCF4	1.94976	RNASE1	1.81844	IL18BP	1.85548
	KIAA1671	1.94308	IGF1	1.81741	INSIG1	1.85429
	PTGFRN	1.91979	BTG2	1.81627	TNFSF14	1.8528
	TCTEX1D1	1.89669	ABHD12	1.8106	PTGS2	1.84162
	P2RY5	1.88658	AKAP11	1.80805	GCNT1	1.84075
	HBEGF	1.87938	LOC727970	1.80698	C19ORF59	1.83587
	NISCH	1.87293	NCF1	1.80649	LOC727962	1.82442
	IRF5	1.86065	BEX1	1.805	ZNF395	1.82126
	CCM2	1.86037	DMXL1	1.80208	LOC652616	1.81969
	GAPT	1.84318	IL8	1.79926	HBEGF	1.80358
	IER3	1.83923	HS.532698	1.78968	PDGFRA	1.79729
	TMEM45B	1.82016	C10ORF105	1.78702	SLC2A3	1.79668
	MAPK8IP2	1.81948	HS.458448	1.78171	SLC25A24	1.79234
	PLEKHF1	1.81904	FCGR2B	1.7792	CDK5RAP2	1.7831
	IL18BP	1.81268	C20ORF3	1.77333	RBM38	1.78195
	LOC653820	1.81203	LOC441759	1.76398	PSTPIP2	1.78137
	CDKN1A	1.80042	RPL8	1.75359	C8ORF45	1.77499
	F13A1	1.79736	MAFF	1.75221	LMOD3	1.772
	TRIM54	1.786	LOC283663	1.75052	NQO1	1.77042
	FCRLA	1.77556	HOXA5	1.74673	RAB38	1.76961
	NQO1	1.77476	HSPE1	1.74607	JARID2	1.76805
	EPB41L3	1.76495	UBE2U	1.73196	HSPA5	1.75872
	CYBASC3	1.76311	P2RY5	1.72834	HOXA5	1.75662
	STOX2	1.76279	PDGFB	1.72761	ATP2A3	1.74375
	MSC	1.76165	SAP30	1.72033	ABI3	1.73966
	EPHB2	1.76085	THBD	1.71717	LOC100131390	1.73031
	MIDN	1.75751	HS.291377	1.71586	TFAP2C	1.72599
	ANXA11	1.75407	ARMC9	1.71293	RPL10	1.72353
	CD93	1.75226	RGS10	1.71095	SLC9A9	1.72136
	IRF2BP2	1.74924	ETS2	1.71	LOC100129882	1.68953
	SAMSN1	1.7301	C14ORF43	1.70455	C20ORF123	1.68842
	NBL1	1.72786	OLR1	1.70159	TACC2	1.67882
	SH3PXD2B	1.72594	APBB3	1.69628	EPHB2	1.67801
	ATP8B4	1.72038	TACC2	1.68464	NCF4	1.67779
	KLF13	1.69946	CDKN1A	1.6845	ITGA11	1.67172
	NINJ1	1.69742	RAB38	1.68368	FAM73A	1.67105
	GPR82	1.69625	RBP1	1.67758	METRNL	1.66936
	TACC2	1.69112	ARL4C	1.67286	SRPX	1.66752
	BTG2	1.68963	ITGA9	1.66497	GCLC	1.66545
	BHLHB3	1.68855	CAMK2B	1.66359	MAFF	1.65619
	SEPP1	1.68499	LOC652424	1.66316	HS.564097	1.65509
	C10ORF105	1.68362	PDK4	1.66098	C3ORF59	1.64639
	LOC100133234	1.6835	GIYD2	1.65581	SNAPC1	1.64264
	RIN1	1.67901	NCF1C	1.65434	ALOX5	1.6425
	GCLC	1.67338	TMEM26	1.65419	LOC440015	1.64223
