# Supplementary material for: The aryl hydrocarbon receptor and interferon gamma generate antiviral states via transcriptional repression
Source: eLife. 2018 Aug 22;7:e38867. doi: 10.7554/eLife.38867 (PMC6120754; doi:10.7554/eLife.38867)
Supplement: Supplementary file 2. — The fold change in mRNA levels, relative to carrier treated cells, for the top 100 AhR-activation-repressed genes is given. [file elife-38867-supp2.xlsx]

## Sheet: Supplementary File 2
	Donor 1		Donor 2		Donor 3
	Gene:	Fold change	Gene:	Fold change	Gene:	Fold change
	CXCL10	0.212012	IFI44L	0.109112	IFIT1	0.126371
	CDC45L	0.277169	CXCL10	0.1104	IFI44L	0.135511
	TYMS	0.277739	IFIT2	0.138611	MX1	0.164877
	IFIT1	0.293119	IFIT1	0.152066	HERC5	0.185312
	GINS2	0.306073	IFIT3	0.172766	IFIT2	0.191597
	MCM7	0.307527	RSAD2	0.195626	RSAD2	0.202189
	IFIT2	0.31728	MX2	0.196822	MX2	0.204811
	NCAPG	0.325457	OASL	0.198434	CXCL10	0.221292
	HERC5	0.325732	MX1	0.204276	IFIT3	0.226346
	KIAA0101	0.327094	ISG15	0.216696	EPSTI1	0.251916
	TOP2A	0.328323	HERC5	0.218308	OAS2	0.256637
	IFI44L	0.334384	CCL8	0.218374	CDC45L	0.258108
	E2F2	0.336378	OAS2	0.229161	UHRF1	0.259181
	CDC20	0.343578	EPSTI1	0.236842	MCM7	0.25988
	UHRF1	0.345228	IFI44	0.256428	IFI44	0.274886
	HS.545589	0.345238	OAS3	0.303904	HS.545589	0.288177
	CDCA5	0.348746	PRIC285	0.31151	E2F2	0.288581
	MARCKS	0.354087	STAT1	0.323376	CCNE2	0.295477
	CCNA2	0.35984	XAF1	0.325506	ISG15	0.299369
	EXO1	0.362486	IRF7	0.348935	TYMS	0.301359
	HAMP	0.367019	USP18	0.349738	GINS2	0.316919
	UBE2C	0.373372	SAMD9L	0.353455	RNU6ATAC	0.330269
	CCNE2	0.3772	OAS1	0.366387	PARP14	0.335568
	CEP55	0.380367	CXCL11	0.383046	KIAA0101	0.337442
	RAD51AP1	0.384285	PARP9	0.383504	NCAPG	0.345794
	NEXN	0.38481	GBP1	0.407015	MCM10	0.349533
	CDC2	0.384881	EIF2AK2	0.414473	OAS1	0.353458
	IFIT3	0.385986	HERC6	0.417003	OAS3	0.358704
	PLK4	0.392544	TNFSF10	0.423184	C11ORF82	0.36197
	USP18	0.394063	SP110	0.42612	MAD2L1	0.365103
	MCM10	0.394468	IFI35	0.431989	OASL	0.36801
	CDT1	0.394558	GBP5	0.448073	MCM4	0.373651
	HSPE1	0.394685	IL4I1	0.448689	P2RX7	0.383506
	MX1	0.39622	ISG20	0.452254	LOC100008589	0.385481
	CCL8	0.400334	IFI27	0.457794	PRIC285	0.387504
	PRC1	0.404698	DDX58	0.466391	PRC1	0.387988
	IFI44	0.404768	GBP4	0.471906	PARP9	0.392071
	HMMR	0.411058	IFIH1	0.472103	PRIM1	0.393462
	TMEM97	0.41153	PARP14	0.472304	EXO1	0.395869
	C11ORF82	0.411664	SAMD9	0.477181	CDCA5	0.396653
	NDC80	0.411825	SDS	0.489316	STAT1	0.396969
	CENPM	0.412026	AIM2	0.492528	IRF7	0.397547
	MCM4	0.412869	HAMP	0.5094	CDCA7	0.397959
	GAL3ST4	0.41428	HESX1	0.519103	TRIM22	0.400215
	KIFC1	0.414842	P2RX7	0.523457	DDX60	0.407934
	TMEM106C	0.415148	LOC730099	0.525952	USP18	0.408457
	LOC100133005	0.417098	IFITM2	0.527721	CEP55	0.40856
	MX2	0.421654	TNFAIP6	0.530242	GBP1	0.413513
	ANLN	0.427094	CDC45L	0.537725	ISG20	0.418499
	PPAP2B	0.427129	TRIM22	0.539868	SP110	0.420256
	RNU6ATAC	0.428772	TRIM5	0.541334	POLE2	0.422931
	EPSTI1	0.428835	PDGFRL	0.548828	XAF1	0.427576
	CCL4L1	0.431584	IFITM3	0.550845	IL4I1	0.432733
	MCM6	0.432707	PLSCR1	0.553846	TNFSF10	0.435644
	MELK	0.436817	STAT2	0.566235	CCNA2	0.437573
	TK1	0.442151	CXCL2	0.57228	MCM2	0.440291
	OASL	0.447403	HS.125087	0.573059	SAMD9L	0.441558
	DNAJC9	0.448885	CMPK2	0.573276	HAMP	0.442004
	OIP5	0.449017	SOD2	0.574956	IFI6	0.443465
	FBXO5	0.450999	DHX58	0.578718	ATAD2	0.446335
	MCM2	0.45206	FBXO7	0.578947	TMEM97	0.45053
	SPC25	0.455984	LOC643194	0.579245	HERC6	0.454236
	HELLS	0.459083	DDX60L	0.581949	CDT1	0.45666
	HIST1H4C	0.460157	FAM26F	0.58391	PLK4	0.457544
	FEN1	0.46125	RN5S9	0.587222	MT1X	0.461675
	TRIP13	0.462605	CXCL9	0.587463	SIGLEC14	0.462917
	KIF11	0.462718	LOC400759	0.589325	CDC2	0.463871
	CKAP2L	0.464208	GAL3ST4	0.590717	MELK	0.463874
	CCNB2	0.467942	DDX60	0.594063	EIF2AK2	0.464695
	PRIM1	0.472141	TOR1B	0.595791	MARCKS	0.466939
	CCL3L1	0.472737	LOC646034	0.59584	RAD51AP1	0.472434
	PLSCR1	0.473513	CCL13	0.59692	TNFSF13B	0.478001
	MAD2L1	0.475954	CD80	0.602244	FEN1	0.478296
	ASPM	0.478174	C11ORF82	0.602614	UBE2C	0.480558
	AURKB	0.478193	HS.62927	0.605263	MPP6	0.481229
	CCL3L3	0.481425	UHRF1	0.605285	GBP5	0.482624
	BUB1	0.483056	FAM19A3	0.606961	SAMD9	0.482791
	POLE2	0.487452	CCNE2	0.608327	RFC4	0.486232
	DLGAP5	0.490767	VCAM1	0.609496	PFKM	0.490102
	DEPDC1	0.491626	TNFSF13B	0.610939	CCRL2	0.495352
	GMNN	0.493084	UBE2L6	0.614174	IL1RN	0.500948
	C16ORF75	0.496964	TYMS	0.61422	TTK	0.502459
	CCL3	0.498833	MCM10	0.615932	C3ORF26	0.502676
	STIL	0.500951	MRGPRG	0.616216	MSH6	0.505992
	LOC728835	0.501361	JUP	0.616863	PPAP2B	0.508907
	NUSAP1	0.502574	CLK2P	0.618321	MT2A	0.50917
	UNG	0.502963	SYNM	0.619632	SDS	0.509382
	PRIC285	0.506385	HRASLS3	0.622441	KIF11	0.509417
	CHAF1B	0.510534	IL1RN	0.6243	BUB1	0.510811
	UBE2T	0.512594	IFITM1	0.624638	MYC	0.515133
	STMN1	0.512844	LAP3	0.625587	CENPM	0.515829
	CDC25A	0.513666	DDEF2	0.627201	TIMELESS	0.519642
	TTK	0.514596	LOC100133005	0.627383	MCM5	0.519836
	PCNA	0.515325	ARHGEF15	0.62963	TK1	0.521978
	LOC729816	0.516343	NT5C3	0.63022	KIFC1	0.523758
	SIGLEC14	0.516396	SOX2	0.631769	SNCA	0.524051
	CCL4L2	0.516979	HS.545589	0.632571	MCM6	0.524204
	CHEK1	0.518717	ZC3HAV1	0.634223	POLQ	0.52479
	RFC4	0.518727	GINS2	0.635309	CHAF1B	0.524927
	SP110	0.519231	LOC401914	0.635563	CCL7	0.52512
