# Supplementary material for: The aryl hydrocarbon receptor and interferon gamma generate antiviral states via transcriptional repression
Source: eLife. 2018 Aug 22;7:e38867. doi: 10.7554/eLife.38867 (PMC6120754; doi:10.7554/eLife.38867)
Supplement: Supplementary file 4. — The fold change in mRNA levels, relative to carrier treated cells, for the top 100 IFN-γ-induced genes is given. [file elife-38867-supp4.xlsx]

## Sheet: Supplementary File 4
	Donor 1		Donor 2		Donor 3
	Gene:	Fold change	Gene:	Fold change	Gene:	Fold change
	IDO1	159.029	IDO1	176.732	IDO1	255.335
	CCL8	98.6165	CCL8	125.658	RARRES3	115.25
	GBP5	78.4869	GBP5	101.39	GBP5	73.9129
	RARRES3	71.2925	RARRES3	86.8183	GBP4	73.2248
	GBP4	43.6144	GBP4	61.9431	CCL8	71.8655
	GPBAR1	24.1704	GPBAR1	32.528	GPBAR1	33.0751
	AIM2	19.6723	AIM2	31.3044	GBP1	31.9834
	GBP1	18.8221	ANKRD22	28.4441	LOC400759	26.5092
	ANKRD22	18.0672	LOC400759	23.4594	ISG20	26.1711
	LOC400759	18.0531	VAMP5	22.6904	FAM26F	23.999
	FAM26F	15.7474	RSAD2	22.3131	AIM2	22.7705
	VAMP5	15.0924	ISG20	21.6488	RSAD2	19.3779
	RSAD2	13.6862	GBP1	21.0774	ANKRD22	17.7729
	ISG20	12.873	CXCL10	19.4122	IL27	16.5822
	SERPING1	12.8436	SERPING1	16.5235	CCL2	16.2655
	CXCL10	12.4212	CXCL9	15.7105	IRF1	15.5123
	IRF1	11.6821	CCL2	15.2031	SERPING1	13.934
	CCL2	10.5438	FAM26F	13.4885	VAMP5	13.6797
	GCH1	9.92236	IRF1	12.6577	EPSTI1	12.2177
	ASCL2	9.83389	ASCL2	11.1085	ASCL2	12.0099
	APOL3	9.34708	IL27	10.0338	IFI44L	11.904
	IL27	9.05895	APOL3	9.73143	BRDG1	11.5654
	CXCL9	8.09389	CCL7	8.98938	GCH1	11.4657
	IFIT2	7.61039	STAP1	8.87483	NCF1	11.2727
	EPSTI1	7.23645	GCH1	8.72773	TYMP	11.2257
	CIITA	7.21505	IFI27	8.05974	LOC100133678	11.1421
	GBP2	6.65845	GBP2	7.82155	APOL3	10.7302
	IFI44L	6.50675	SOD2	7.72373	IL18BP	10.5538
	UBD	6.2	TNFSF10	7.2464	IFITM3	10.1517
	STAP1	6.19756	HLA-DOA	7.21795	STAP1	9.67742
	IFIT3	5.76803	MGC33556	7.20448	HLA-DQA1	9.47175
	CD40	5.55713	SOCS1	7.00158	LOC100133583	9.19037
	FGL2	5.52318	BRDG1	6.91888	HLA-DOA	8.853
	WARS	5.35434	IFIT2	6.87687	IL15	8.6
	BRDG1	5.18807	IFITM3	6.66291	IFIT2	8.4417
	NCF1	4.96715	IFI44L	6.61301	TNFSF10	8.31336
	SOCS1	4.93211	RSPO3	6.41176	TNFSF13B	8.31105
	IL15	4.89282	UBD	6.34043	ITGB7	8.07371
	NFIX	4.86356	ITK	6.22462	WARS	7.65364
	STAMBPL1	4.83413	HAPLN3	5.89286	CIITA	7.51534
	STAT1	4.79048	EPSTI1	5.87947	CD40	7.12828
	TNFSF10	4.76174	STAMBPL1	5.62329	ECGF1	6.95244
	FCGR1B	4.75425	TAP1	5.53126	SOCS1	6.78447
	GIMAP8	4.63956	IFIT3	5.42075	IFIT3	6.75644
	FCGR1A	4.58281	GIMAP8	5.35347	STAT1	6.7277
	GK	4.52292	IL15	5.3382	LOC389386	6.62804
	C21ORF7	4.50406	PSTPIP2	5.2702	GBP2	6.60817
	CCL7	4.4166	BATF2	5.24092	HAPLN3	6.34537
	PSTPIP2	4.41154	LOC100133583	5.18858	ZBP1	6.28008
	HAPLN3	4.3144	CIITA	5.13489	FCGR1A	6.25795
	TNFSF13B	4.31158	METTL7B	5.1104	SOD2	6.23649
	FCGR1C	4.28306	NFIX	5.07551	MGC33556	6.07949
	BATF2	4.2767	CD40	4.94304	GIMAP7	5.99601
	TAP1	4.2712	GIMAP4	4.91648	NCF1C	5.99358
	IL15RA	4.21149	SDS	4.90566	FCGR1B	5.93416
	PARP14	4.21039	SLAMF8	4.86382	GIMAP8	5.93249
	HLA-DOA	4.20094	STAT1	4.81098	APOBEC3G	5.89302
	IFITM3	4.17834	HLA-DQB1	4.79703	PSTPIP2	5.89188
	LOC100133583	4.14256	NCF1	4.77429	STAMBPL1	5.88764
	TNFAIP6	4.097	IFI35	4.75448	HLA-DPA1	5.86794
	CD38	4.07191	TAP2	4.75356	GK	5.82183
	HLA-DQA1	4.03728	TNFSF13B	4.60956	FPR1	5.76239
	SOD2	3.98459	WARS	4.59069	TAP1	5.70786
	LOC100133678	3.93582	PSMB9	4.58972	GIMAP6	5.49283
	METTL7B	3.93027	CFB	4.5563	LAP3	5.46514
	TYMP	3.91295	TNFAIP6	4.44888	LRRK2	5.41274
	GIMAP7	3.89384	LOC389386	4.37033	NFIX	5.35586
	CD274	3.8694	IFITM2	4.18416	MX1	5.33626
	CFB	3.86516	FCGR1B	4.07898	CCL7	5.26442
	ETV7	3.85028	FAM107A	4.03641	METTL7B	5.19898
	TNF	3.84581	GK	4.03446	OTOF	5.14984
	PSME2	3.80926	TYMP	4.03138	SCO2	5.11268
	GIMAP6	3.76243	IL15RA	4.01	FGL2	5.1085
	GIMAP4	3.69469	ECGF1	3.98188	GVIN1	5.0789
	MGC33556	3.67871	C21ORF7	3.97655	ANKRD29	5.07556
	C1QC	3.64767	APOBEC3A	3.90625	CD69	5.06439
	MX1	3.64107	APOL2	3.90482	HLA-DPB1	5.05792
	IFI35	3.61579	ITGB7	3.88858	PARP14	5.05607
	LAP3	3.60768	TMEM149	3.81457	BATF2	5.05415
	GVIN1	3.59467	CD274	3.80814	CFB	4.9705
	XAF1	3.58819	PSME2	3.8074	LOC652616	4.96527
	GRIN3A	3.55879	HLA-DPA1	3.79309	CXCL10	4.94528
	TAP2	3.54644	IL18BP	3.75457	RSPO3	4.94523
	ANKRD29	3.53808	C17ORF87	3.74256	ADM	4.94023
	STX11	3.53589	NCF1C	3.74072	C17ORF87	4.9324
	LOC389386	3.50723	SLAMF7	3.71883	TAP2	4.93009
	ECGF1	3.49715	XAF1	3.71622	STX11	4.92542
	SEMA4D	3.47698	NAMPT	3.69311	IFI35	4.88565
	GIMAP5	3.46422	SLC2A6	3.66448	SLAMF8	4.80127
	OAS2	3.4513	LINCR	3.64007	XAF1	4.77052
	HLA-DPB1	3.45066	CASP1	3.63232	APOL2	4.73178
	NOD2	3.44035	GRIN3A	3.63128	SP140	4.69305
	IFI27	3.43974	GIMAP5	3.62593	SEMA4D	4.6276
	IFITM2	3.43874	FAM20A	3.62246	OAS2	4.60446
	LRRK2	3.39623	PARP14	3.60999	JAK2	4.6041
	LINCR	3.37241	C1S	3.58824	C1QB	4.52758
	ITGB7	3.36779	GIMAP6	3.58487	COLQ	4.52516
	FPR1	3.36721	CD38	3.58439	SAMD9L	4.48937
	LOC728744	3.36283	CASZ1	3.53925	GIMAP4	4.42439
	SP140	3.36281	FCGR1A	3.53816	LINCR	4.42229
