# Supplementary material for: The aryl hydrocarbon receptor and interferon gamma generate antiviral states via transcriptional repression
Source: eLife. 2018 Aug 22;7:e38867. doi: 10.7554/eLife.38867 (PMC6120754; doi:10.7554/eLife.38867)
Supplement: Supplementary file 5. — The fold change in mRNA levels, relative to carrier treated cells, for the top 100 IFN-γ-repressed genes is given. [file elife-38867-supp5.xlsx]

## Sheet: Supplementary File 5
	Donor 1		Donor 2		Donor 3
	Gene:	Fold change	Gene:	Fold change	Gene:	Fold change
	TYMS	0.13773	OLR1	0.186307	KIAA0101	0.179235
	KIAA0101	0.152972	COLEC12	0.192718	PRC1	0.208163
	UBE2C	0.155289	GPD1	0.199946	VWF	0.246184
	CDC20	0.163173	TPD52L1	0.208101	PODXL	0.246492
	CDC2	0.164876	EBI2	0.208871	E2F2	0.248232
	PRC1	0.165647	KIAA0101	0.227104	GPD1	0.250464
	TNFRSF21	0.166567	MXD4	0.228365	UBE2C	0.254269
	TOP2A	0.170705	FSCN1	0.228421	SLC25A29	0.268222
	SLC16A10	0.177983	GPR34	0.23042	NCAPG	0.271062
	NCAPG	0.196989	TYMS	0.23297	TOP2A	0.284685
	DLGAP5	0.201335	VWF	0.237378	FSCN1	0.287062
	STMN1	0.206447	PDE3B	0.248216	CDC20	0.287229
	HMMR	0.209022	STMN1	0.251582	LOC642755	0.295239
	VWF	0.212003	AKR1C3	0.257179	C11ORF45	0.296305
	CDCA5	0.215112	PODXL	0.258492	MXD4	0.297693
	GPR34	0.216188	XYLT1	0.259735	NUDT7	0.307382
	CCNB2	0.223819	SLC16A10	0.262066	DPYSL3	0.309733
	SCG5	0.225793	TIMP3	0.266689	FBXO38	0.313874
	HIST1H4C	0.227096	PRC1	0.273047	CDC45L	0.314717
	TTK	0.227732	CD300LB	0.279059	HMMR	0.31599
	NUDT7	0.227902	TMEM158	0.279396	CDC2	0.316882
	NUSAP1	0.230464	CXCR5	0.2817	DLGAP5	0.319022
	CCNE2	0.232548	MGC52282	0.283141	TMEM151A	0.32267
	CDC45L	0.24186	SEL1L2	0.285912	SLC16A10	0.324994
	CEP55	0.244035	TOP2A	0.289846	OLR1	0.326361
	AKR1C3	0.244139	FBXO38	0.29084	DEXI	0.326851
	FSCN1	0.248779	CDC20	0.291382	PDE3B	0.330394
	SLC25A29	0.24914	PHACTR1	0.294574	TMEM158	0.336291
	COLEC12	0.250612	RGS2	0.296842	EBI2	0.339853
	RGS2	0.255875	LOC642755	0.30241	GPR34	0.342439
	PHACTR1	0.261913	TSPAN13	0.315665	NUSAP1	0.343918
	EBI2	0.262573	CDC2	0.316649	RGS2	0.344531
	PDE3B	0.263079	FAM179A	0.321575	USP2	0.345256
	CERK	0.263356	UBE2C	0.321866	GINS2	0.348449
	GINS2	0.267614	RGS18	0.324245	CXCR5	0.355167
	MXD4	0.269182	TMEM45A	0.324346	ITGB1BP3	0.356707
	CAMP	0.273927	DPYSL3	0.324446	TLR5	0.358933
	BUB1	0.278968	KCNJ1	0.324538	MYH10	0.361529
	CKAP2L	0.28103	DCAF6	0.324802	ASPM	0.366323
	MAD2L1	0.2819	NUDT7	0.325698	CERK	0.367382
	E2F2	0.282179	CERK	0.326538	SVIL	0.368638
	LOC642755	0.283734	DLGAP5	0.328435	TYMS	0.371534
	GPER	0.28426	ITGB1BP3	0.328687	SLC45A3	0.372937
	MCM7	0.285628	ATP9A	0.328696	CDKN3	0.375413
	DEXI	0.286042	LOC100129882	0.333715	HIST1H4C	0.376765
	PODXL	0.290337	CDC45L	0.336402	FAM179A	0.37739
	NEK2	0.292172	METTL7A	0.337712	ITGA3	0.377592
	ASPM	0.29258	CCNB2	0.339953	AKR1C3	0.379379
	TPD52L1	0.294379	LPL	0.34065	CEP55	0.380975
	CDKN3	0.296557	TNFRSF21	0.342252	STMN1	0.385917
	KIF11	0.297043	E2F2	0.343772	CENPM	0.390468
	DPYSL3	0.298409	OPN3	0.344144	MRGPRF	0.392654
	LPL	0.302611	DEXI	0.344326	GPER	0.392735
	TMEM151A	0.304036	ZFP36L1	0.349194	MCM10	0.393103
	FBXO38	0.304724	SLC25A29	0.349836	TPD52L1	0.393443
	METTL7A	0.310811	BNIP3L	0.350156	PHACTR1	0.394508
	OIP5	0.311121	SLC45A3	0.351102	CCNB2	0.395435
	CDKN2B	0.313391	CXCR4	0.35163	CD300LB	0.397424
	SDC1	0.315821	NCAPG	0.351686	ZFP36L1	0.400553
	BNIP3L	0.317087	SCG5	0.356012	CDCA5	0.400794
	TMEM97	0.323155	FAM13A	0.357117	TMEM97	0.402147
	UBE2T	0.323171	CD14	0.359195	XYLT1	0.402799
	HMGB2	0.323313	MYH10	0.361371	CLEC12A	0.402836
	MCM4	0.324896	NUSAP1	0.362884	KRT79	0.404151
	MCM10	0.325971	GREM1	0.364123	CKAP2L	0.40625
	AMDHD1	0.328403	TMEM151A	0.367313	SLC30A3	0.410231
	C11ORF45	0.330223	STK39	0.36747	CCNE2	0.414798
	TK1	0.330372	PDK4	0.36906	HAMP	0.418732
	GPD1	0.334094	CAMP	0.370429	SCG5	0.420217
	ITGA3	0.336083	GPER	0.372763	PHF19	0.422272
	ZFP36L1	0.336538	CLINT1	0.373263	METTL7A	0.422872
	CENPM	0.337084	LOC646347	0.374545	SNAI3	0.428121
	ANLN	0.337451	CLIP4	0.376466	ATP9A	0.428326
	CCNA2	0.339108	SPARC	0.377899	SYNGR1	0.428665
	ALOX5AP	0.339923	HS.371609	0.37979	BCL11A	0.429769
	FAM179A	0.340767	C11ORF45	0.381187	MFAP4	0.429861
	TMEM158	0.341523	OLFML2B	0.382414	C3ORF54	0.433828
	ITGB1BP3	0.341786	CCND2	0.382467	AGRP	0.434594
	CCNB1	0.34188	ABHD7	0.382798	DCAF6	0.435276
	CD300LB	0.34344	TTC3	0.382992	CAPN11	0.436746
	EXO1	0.346922	SMS	0.384062	MCM2	0.43733
	XYLT1	0.348494	KIAA1147	0.384502	ABCC5	0.43916
	SLC30A3	0.350028	TLR5	0.384876	C7ORF68	0.442424
	NCK2	0.351013	ACOT2	0.385314	PNPLA7	0.442555
	DCAF6	0.352022	CLEC12A	0.385489	COLEC12	0.4429
	CEP70	0.355177	CEP55	0.386424	TTK	0.446232
	C19ORF59	0.355622	GADD45A	0.387425	TFPI	0.446756
	GOLGA7B	0.357174	SVIL	0.388137	RAP1GAP	0.447005
	ATP8B4	0.357864	CAPN11	0.389207	CDH23	0.447664
	USP2	0.358947	LOC653752	0.389884	LOC100134134	0.447933
	RAP1GAP	0.359157	CDCA5	0.391059	STX2	0.448464
	ACOT2	0.359315	DPYSL2	0.391789	FNBP1L	0.449485
	TTC3	0.359772	STS-1	0.392343	UBE2T	0.45126
	SPARC	0.359888	CDH23	0.393607	KIF11	0.453141
	OLFML2B	0.360718	ADD3	0.394142	TDRD9	0.453415
	CCDC34	0.362489	AMDHD1	0.395472	GFOD1	0.454712
	LFNG	0.363077	C7ORF68	0.396717	UTS2	0.456076
	FAM13A	0.363132	BRI3BP	0.396767	ME3	0.457205
	NOTCH3	0.367287	HSPA1A	0.397208	EXO1	0.457711
	TNFSF14	0.367558	AMICA1	0.397424	CTDSPL	0.459284
