# Supplementary figures and images for: The aryl hydrocarbon receptor and interferon gamma generate antiviral states via transcriptional repression
Source: eLife journal article supplement (doi:10.7554/elife.38867), 2018-08-22

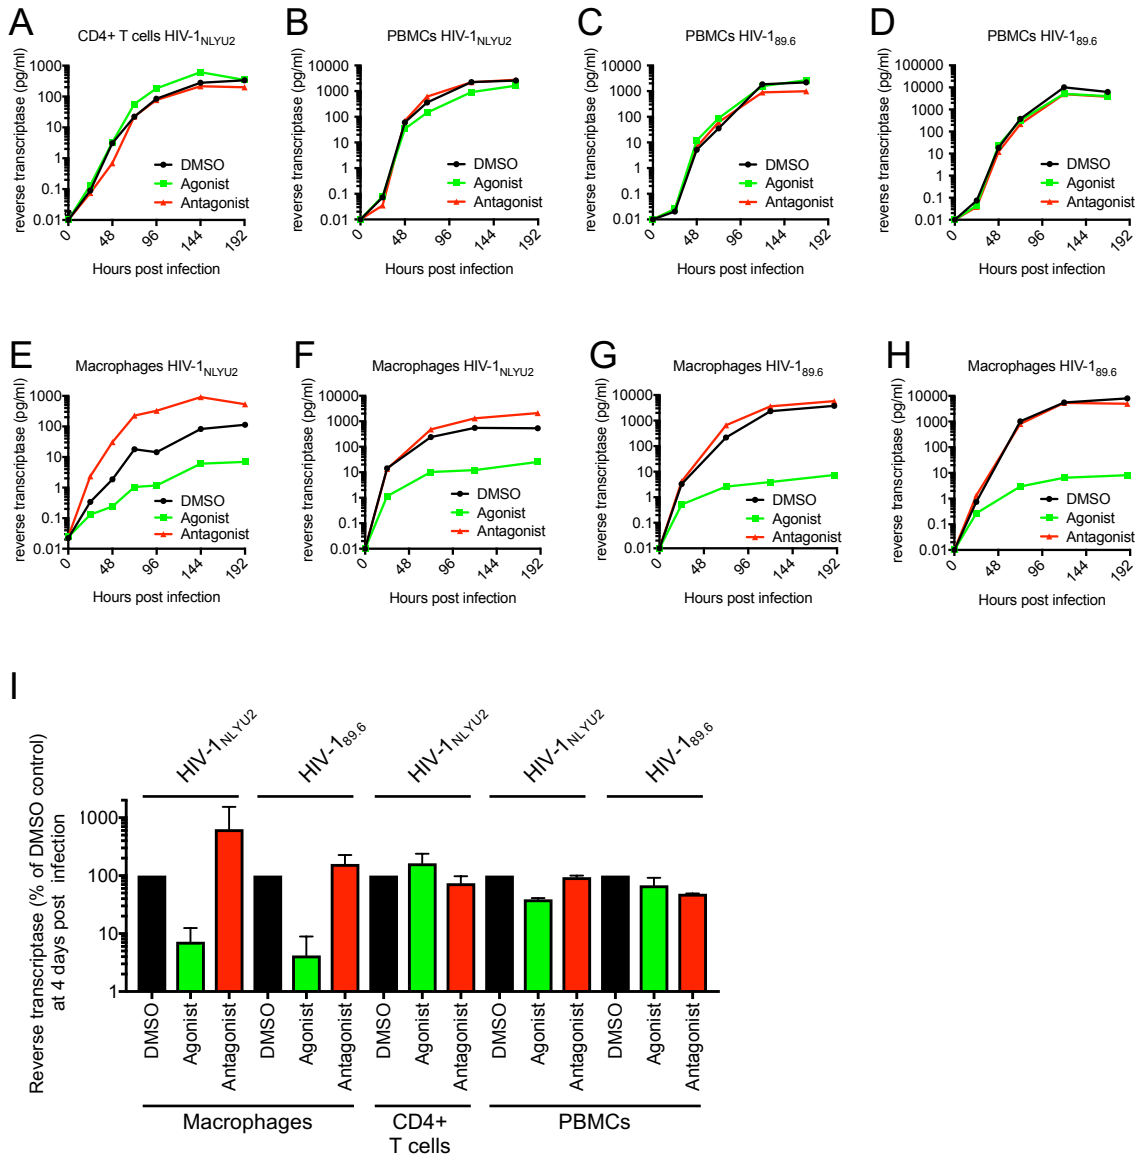

Supplement: supp [file elife_poa_e38867_Figure_1_figure_supplement_1.pdf › elife_poa_e38867_Figure_1_figure_supplement_1.pdf]

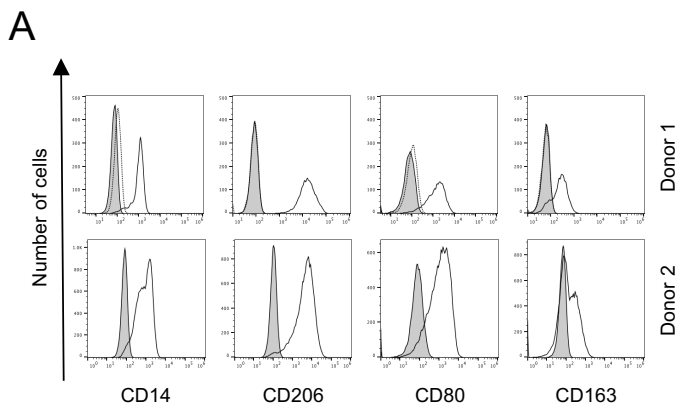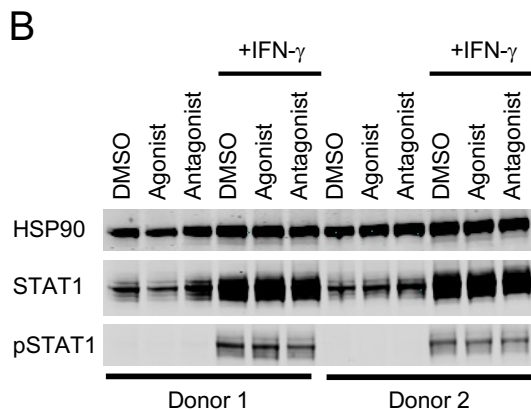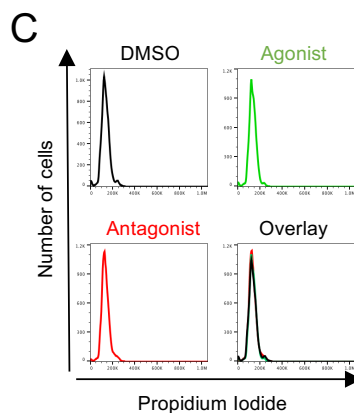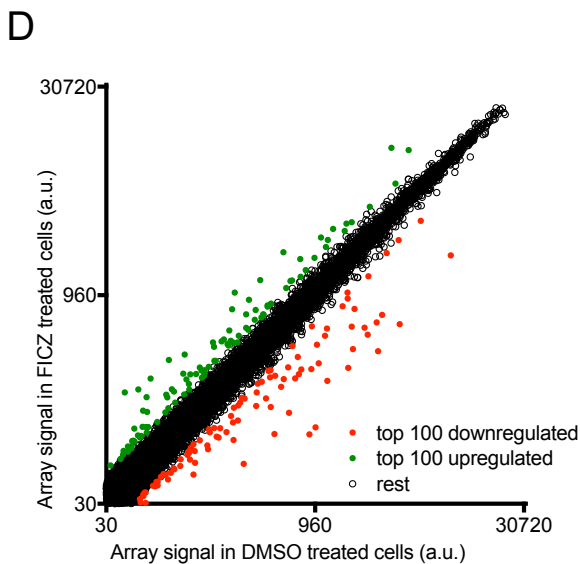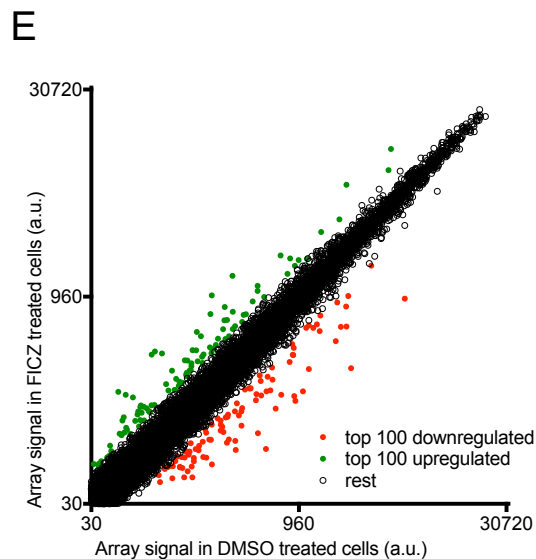

Supplement: supp [file elife_poa_e38867_Figure_1_figure_supplement_2.pdf › elife_poa_e38867_Figure_1_figure_supplement_2.pdf]

**A**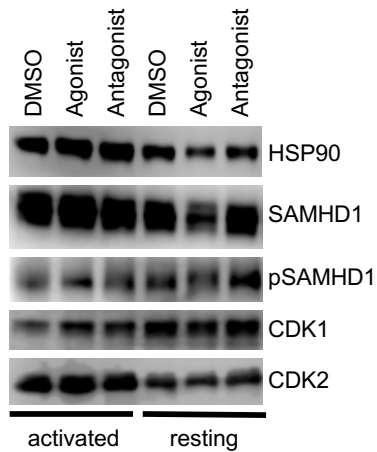**B**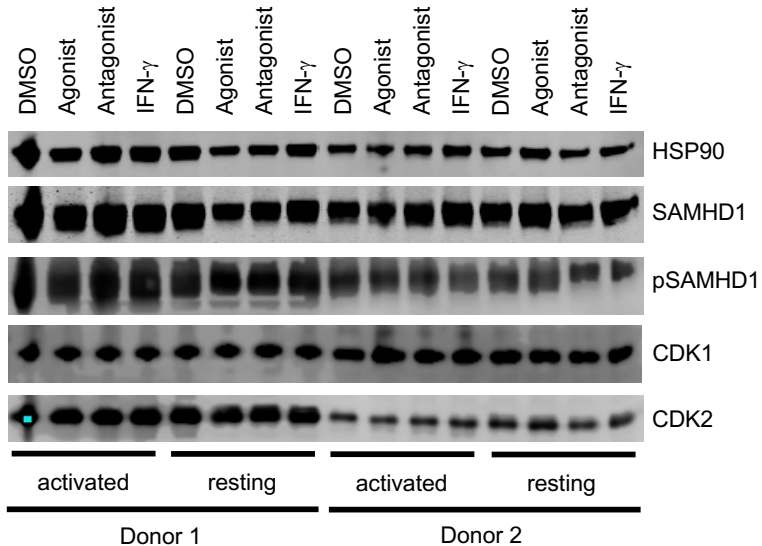

Supplement: supp [file elife_poa_e38867_Figure_2_figure_supplement_1.pdf › elife_poa_e38867_Figure_2_figure_supplement_1.pdf]

A

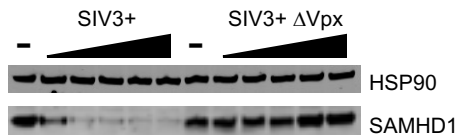

B

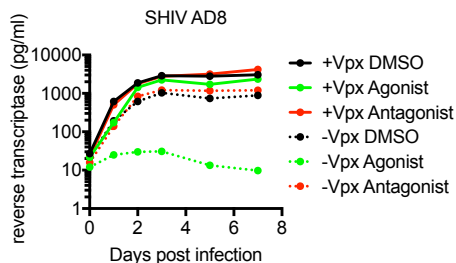

C

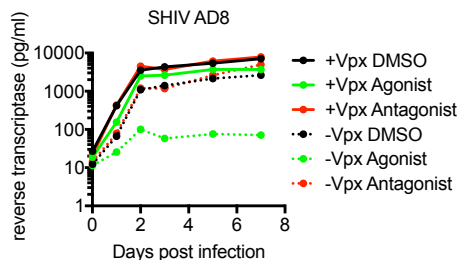

D

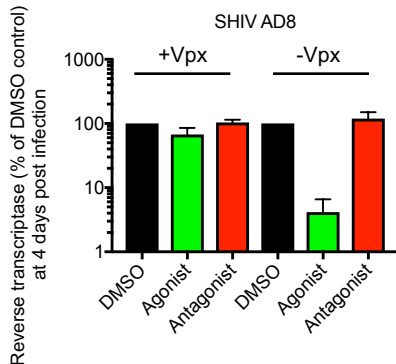

Supplement: supp [file elife_poa_e38867_Figure_3_figure_supplement_1.pdf › elife_poa_e38867_Figure_3_figure_supplement_1.pdf]

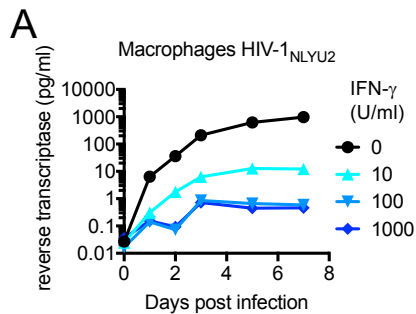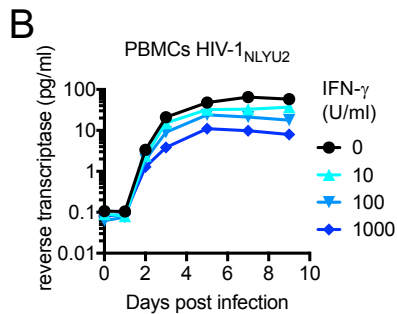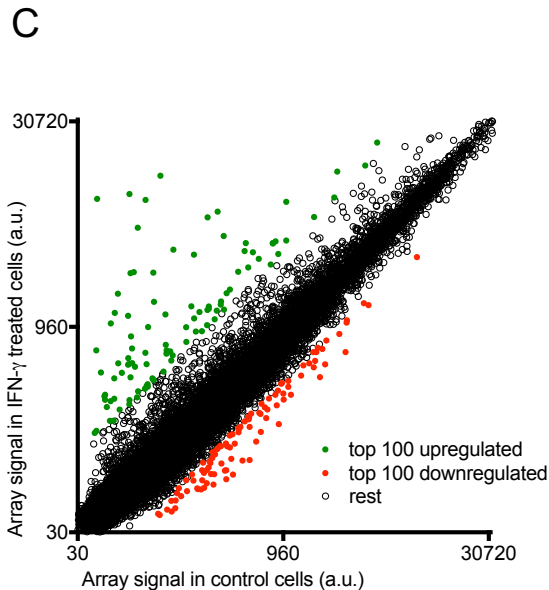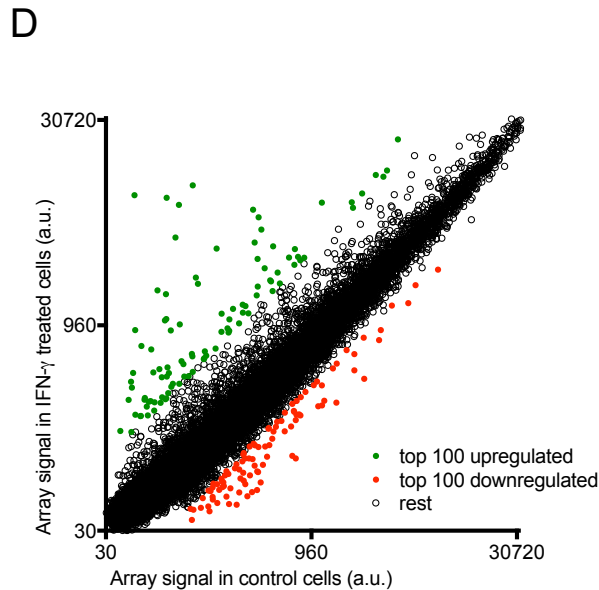

Supplement: supp [file elife_poa_e38867_Figure_4_figure_supplement_1.pdf › elife_poa_e38867_Figure_4_figure_supplement_1.pdf]

**A**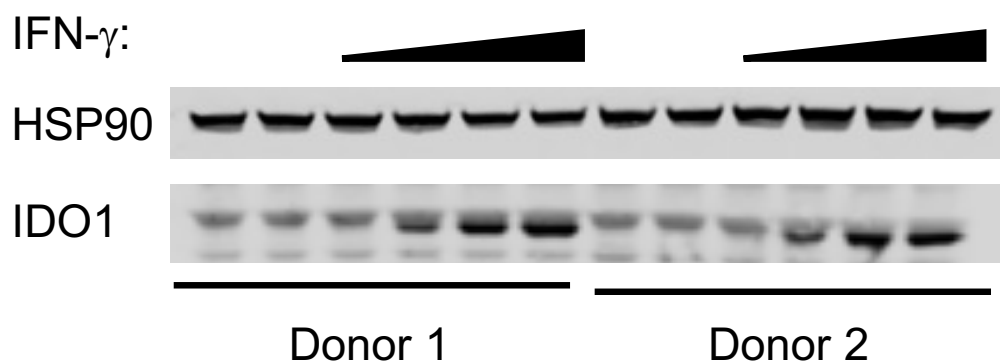**B**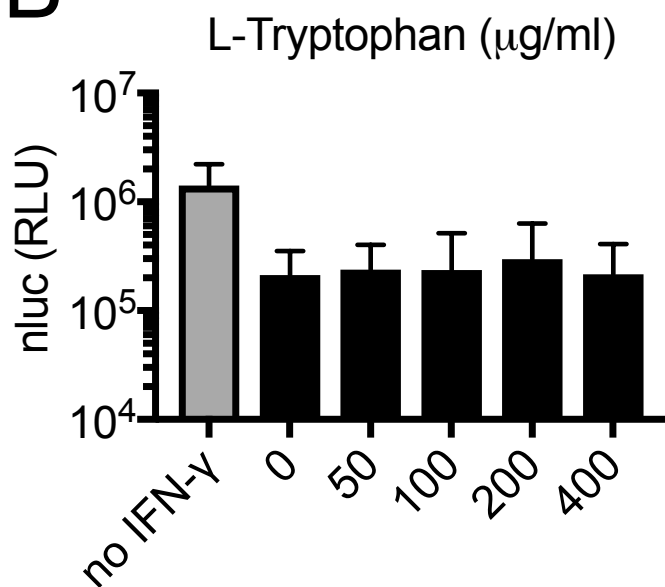**C**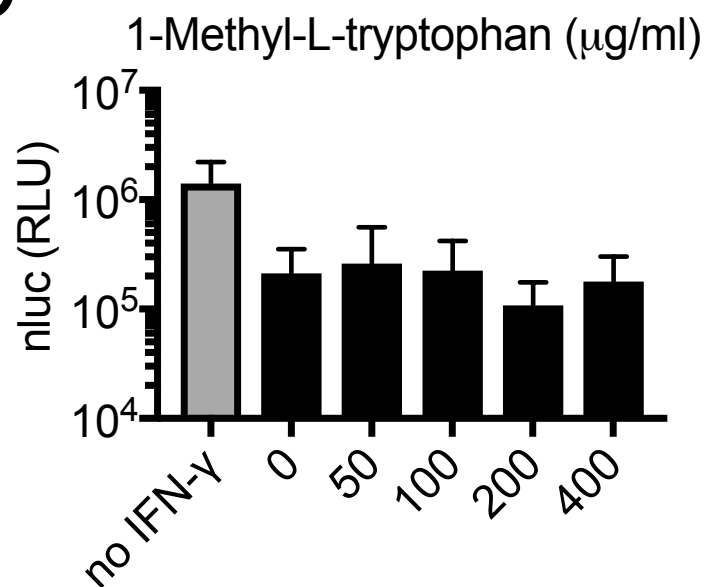**D**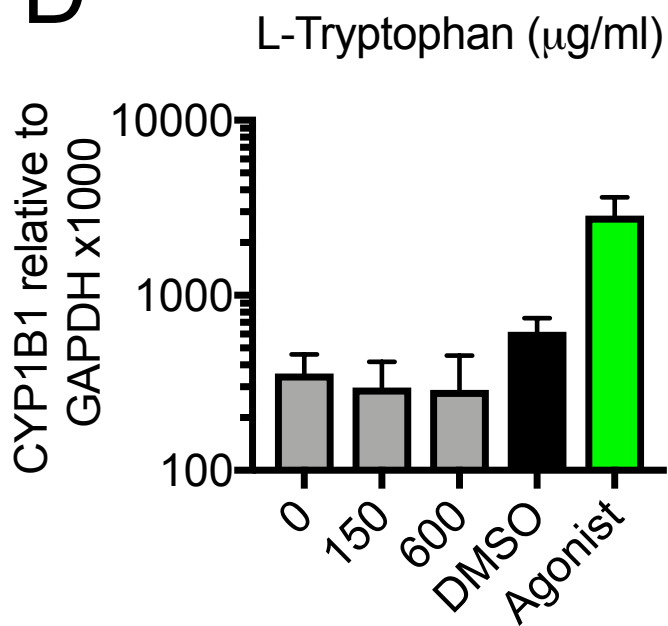**E**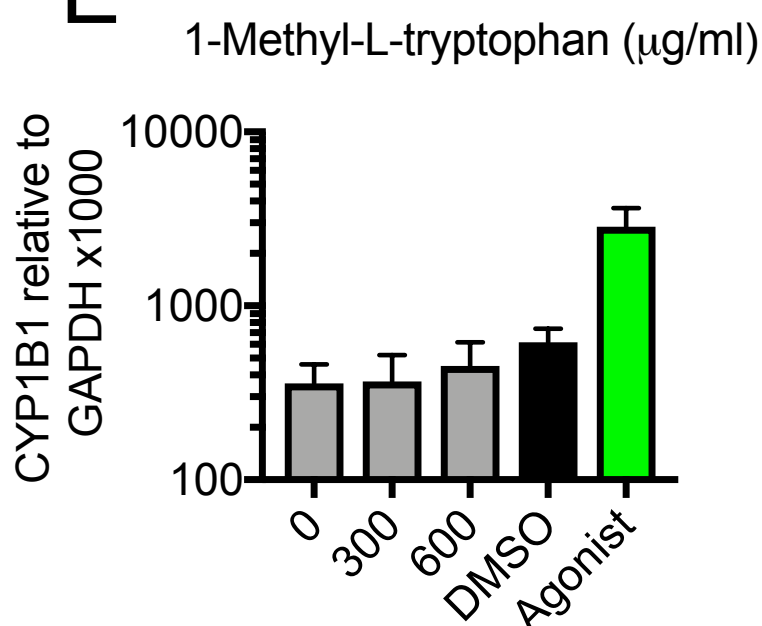

Supplement: supp [file elife_poa_e38867_Figure_4_figure_supplement_2.pdf › elife_poa_e38867_Figure_4_figure_supplement_2.pdf]
